# Supplementary material for: Identification of the early intermediates formed in ozonolysis of cis-2-butene and limonene: a theoretical and matrix isolation study
Source: Royal Society of Chemistry journal article supplement (doi:10.1039/c9ra04176a), 2019-01-01
Supplement: c9ra04176a1.pdf [file c9ra04176a1.pdf]

**Figure S1**

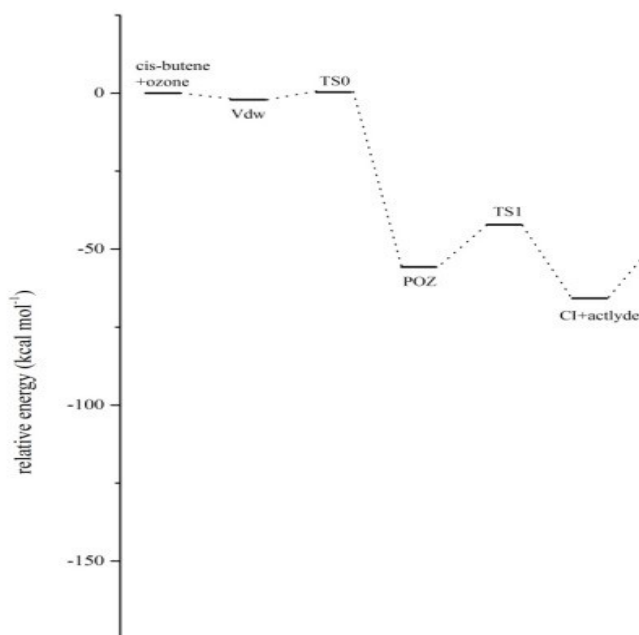

**Figure S1.** The potential energy surface (PES) of *cis*-2-butene ozonolysis.

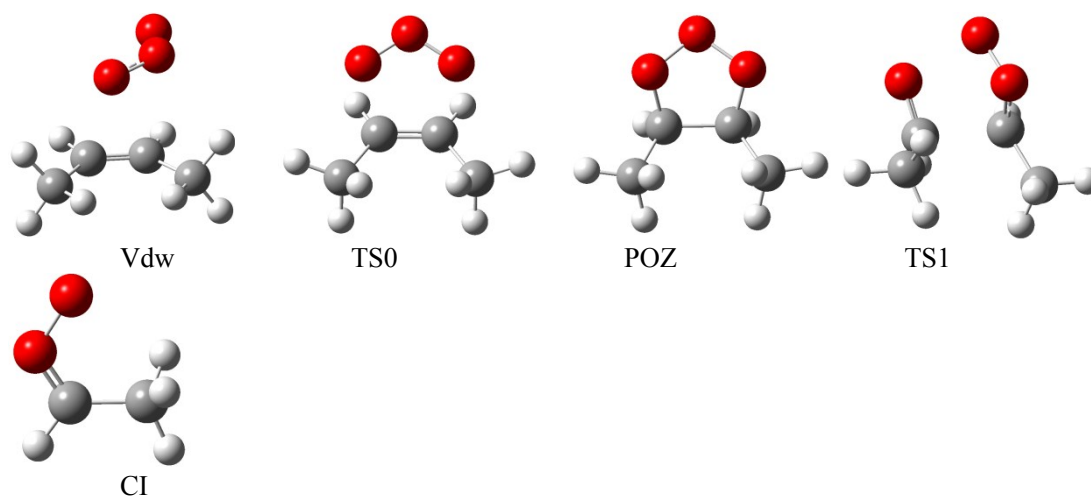

**Figure S2.** The optimized molecular structures of the involved substances in the ozonolysis of *cis*-2-butene.

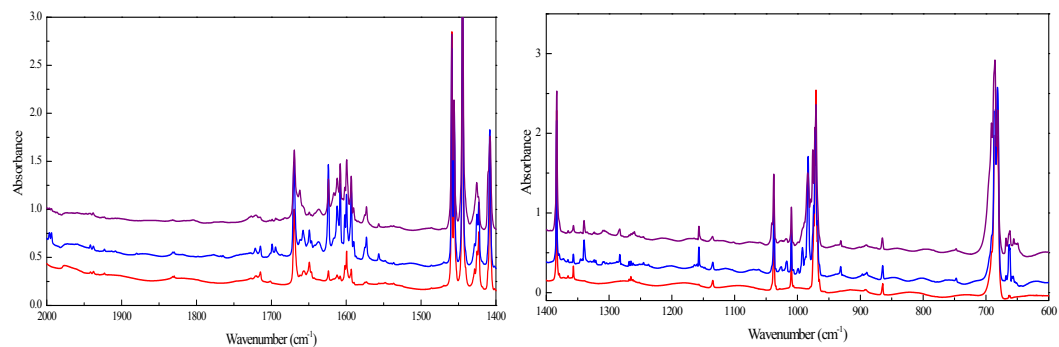

**Figure S3.** Infrared spectra of the co-deposition of the samples of Ar/*cis*-2-butene=200 and Ar/ $^{18}\text{O}_3$ =200. The blue line (middle) indicates initial deposition at 14 K and the purple line (top) represents the spectrum after annealing to 35 K, compared to a blank spectrum of Ar/*cis*-2-butene=200 (red, bottom).

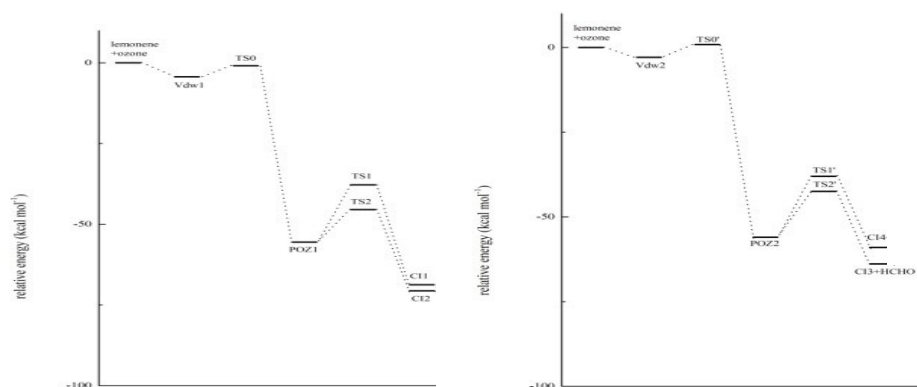

**Figure S4.** The potential energy surface (PES) limonene ozonolysis. Left: ozone interacts with the C=C double bond within the carbon ring of the limonene molecule. Right: ozone interacts with the C=C double bond within the side chain of the limonene molecule.

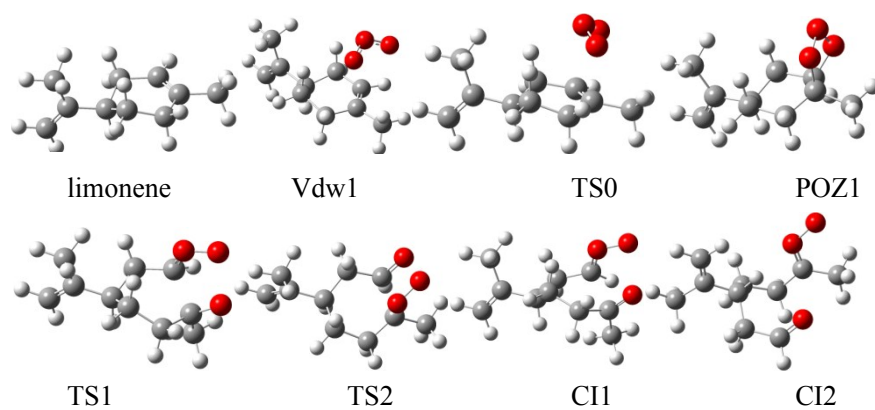

**Figure S5.** The optimized molecular structures of the involved substances in the ozonolysis of limonene (ozone interacts with the C=C double bond within the carbon ring of the limonene molecule)

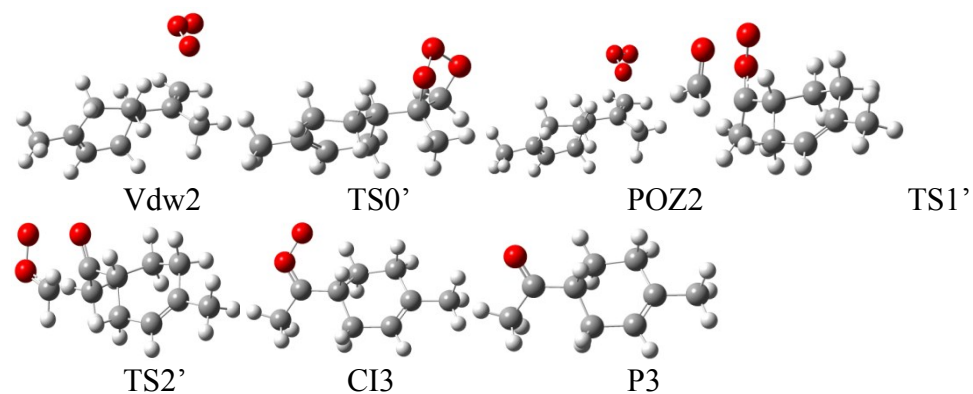

**Figure S6.** The optimized molecular structures of the involved substances in the ozonolysis of limonene (ozone interacts with the C=C double bond within the side chain of the limonene molecule).

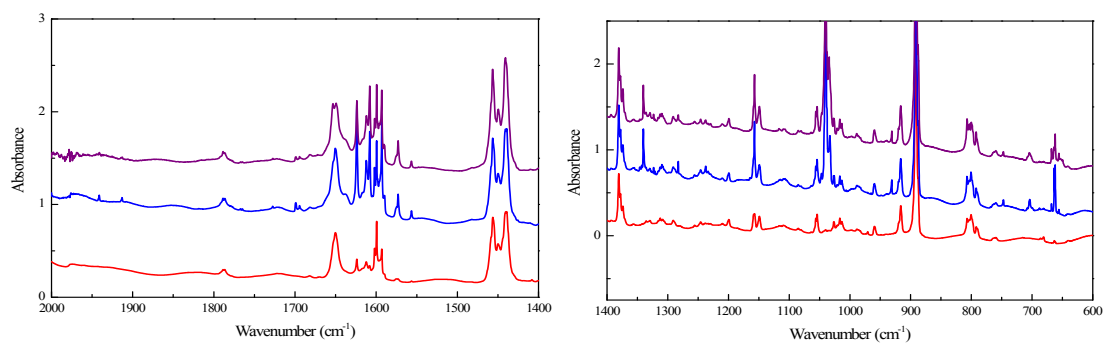

**Figure S7.** Infrared spectra of the co-deposition of the samples of Ar/limonene=200 and Ar/<sup>18</sup>O<sub>3</sub> =200. The blue line (middle) indicates initial deposition at 14 K and the purple line (top) represents the spectrum after annealing to 35 K, compared to a blank spectrum of Ar/limonene =200 (red, bottom).
